# Supplementary material for: Acceptors and Effectors Alter Substrate Inhibition Kinetics of a Plant Glucosyltransferase NbUGT72AY1 and Its Mutants
Source: MDPI journal article supplement (doi:10.3390/ijms24119542), 2023-05-31
Supplement: s1 [file s1]

# SUPPLEMENTAL MATERIAL

## Acceptors and Effectors Alter Substrate Inhibition Kinetics of a Plant Glucosyltransferase NbUGT72AY1 and Its Mutants

Jieren Liao <sup>1</sup>, Veronika Lederer <sup>1</sup>, Alba Bardhi <sup>1</sup>, Zhiwei Zou <sup>1</sup>, Timothy D. Hoffmann <sup>1</sup>, Guangxin Sun <sup>1,†</sup>, Chuankui Song <sup>2</sup>, Thomas Hoffmann <sup>1</sup> and Wilfried Schwab <sup>1,\*</sup>

<sup>1</sup> Biotechnology of Natural Products, Technische Universität München, Liesel-Beckmann-Str. 1, 85354 Freising, Germany; jieren.liao@tum.de (J.L.); veronika.lederer@tum.de (V.L.); aalbabardhi10@gmail.com (A.B.); ga96loj@mytum.de (Z.Z.); timothy.d.hoffmann@tum.de (T.D.H.); sgx\_here@hotmail.com (G.S.); tom.hoffmann@tum.de (T.H.)

<sup>2</sup> State Key Laboratory of Tea Plant Biology and Utilization, International Joint Laboratory on Tea Chemistry and Health Effects, Anhui Agricultural University, Hefei 230036, China; sckfriend@163.com

\* Correspondence: wilfried.schwab@tum.de

† Current address: Department of Molecular Biophysics and Biochemistry, Yale University, New Haven, CT 06510, USA.

**Figure S1. Schemes of the generated mutants.**

**Figure S2. LC-MS analysis of substrates and products of NbUGT72AY1.**

**Figure S3. Enzyme activity of NbUGT72AY1 toward vanillin in the presence of fatty acids as determined by LC-MS analysis.**

**Figure S4. Enzymatic reaction in the presence of micelles and vesicles formed by fatty acid effectors.**

**Figure S5: Verification of NbUGT72AY1 mutant protein by SDS-PAGE.**

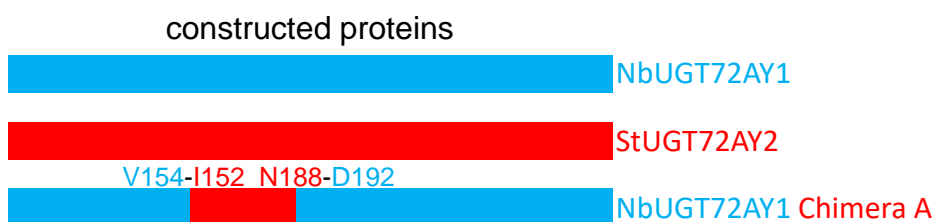

**Figure S1. Schemes of the generated mutants.** Chimera A contains a part of StUGT72AY2. StUGT72AY2 is a homolog of NbUGT72AY1 but shows no substrate inhibition with scopoletin [19]

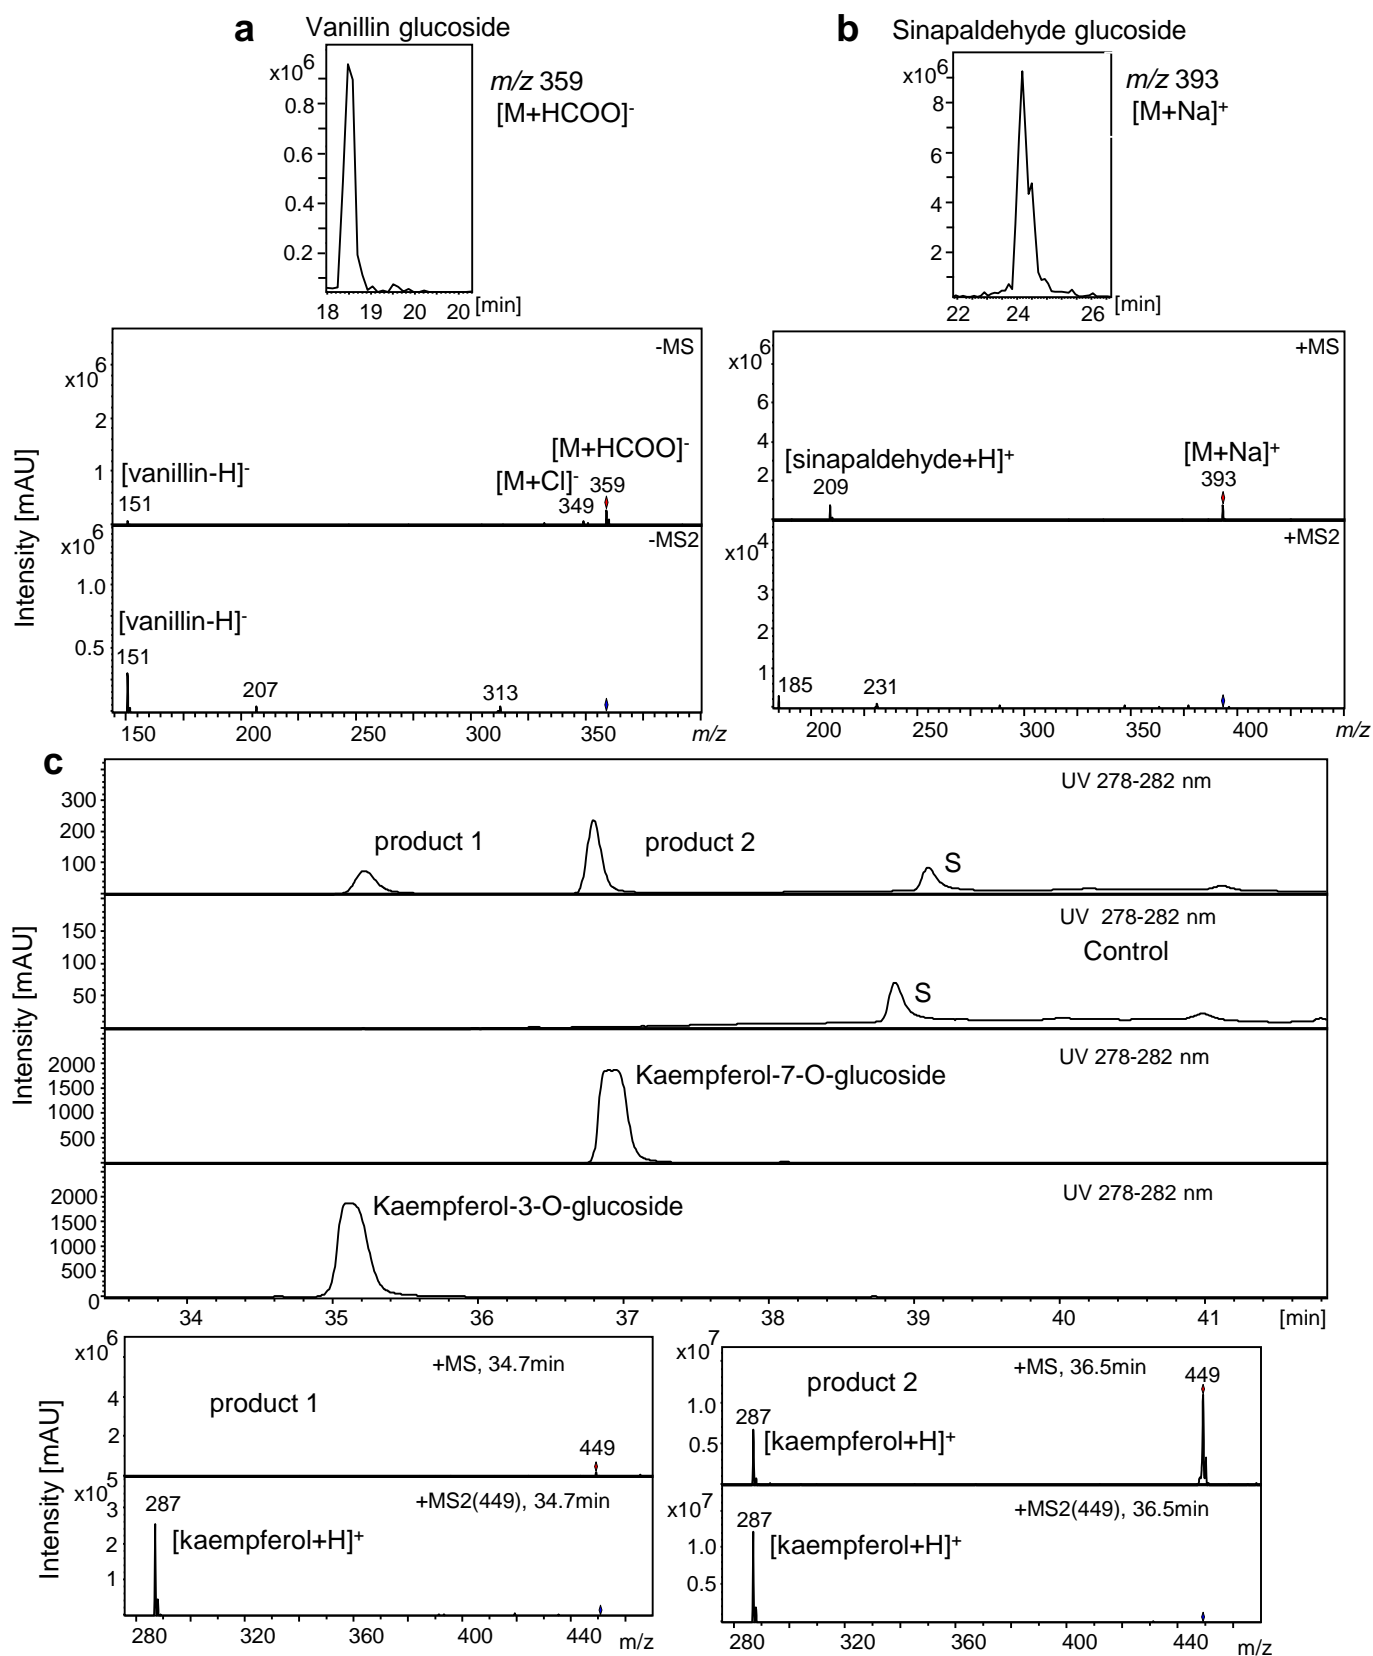

**Figure S2. LC-MS analysis of substrates and products of NbUGT72AY1.** Chromatogram (top), mass spectrum (MS) and product ion spectra (MS2) acquired in the positive (+) and negative mode (-). **(a)** Vanillin glucoside and **(b)** sinapaldehyde glucoside. **(c)** Ultraviolet detection (UV) at 278–282 nm of kaempferol (S) and two products. The products were identified as product 1 kaempferol-3-O-glucoside and product 2 kaempferol-7-O-glucoside by comparison with chromatographic data obtained for the reference compounds.

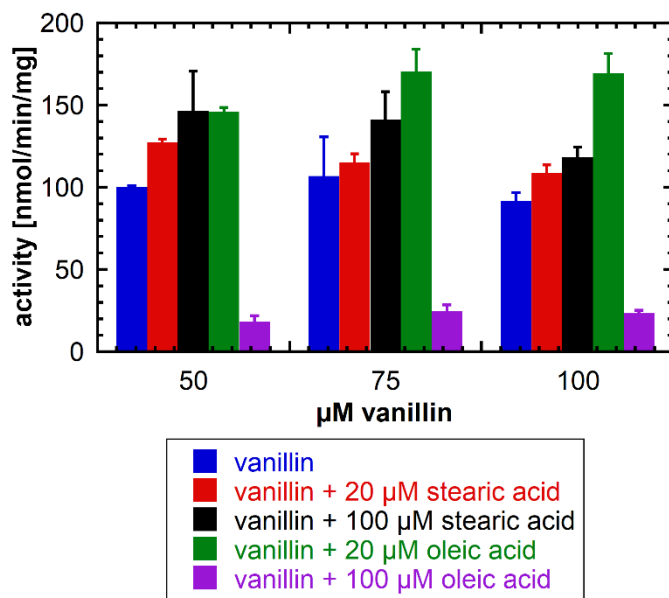

**Figure S3. Enzyme activity of NbUGT72AY1 toward vanillin in the presence of fatty acids as determined by LC-MS analysis.** NbUGT72AY1 was used to glucosylate vanillin in the presence of stearic acid and oleic acid. Experimental data were determined by LC-MS analysis.

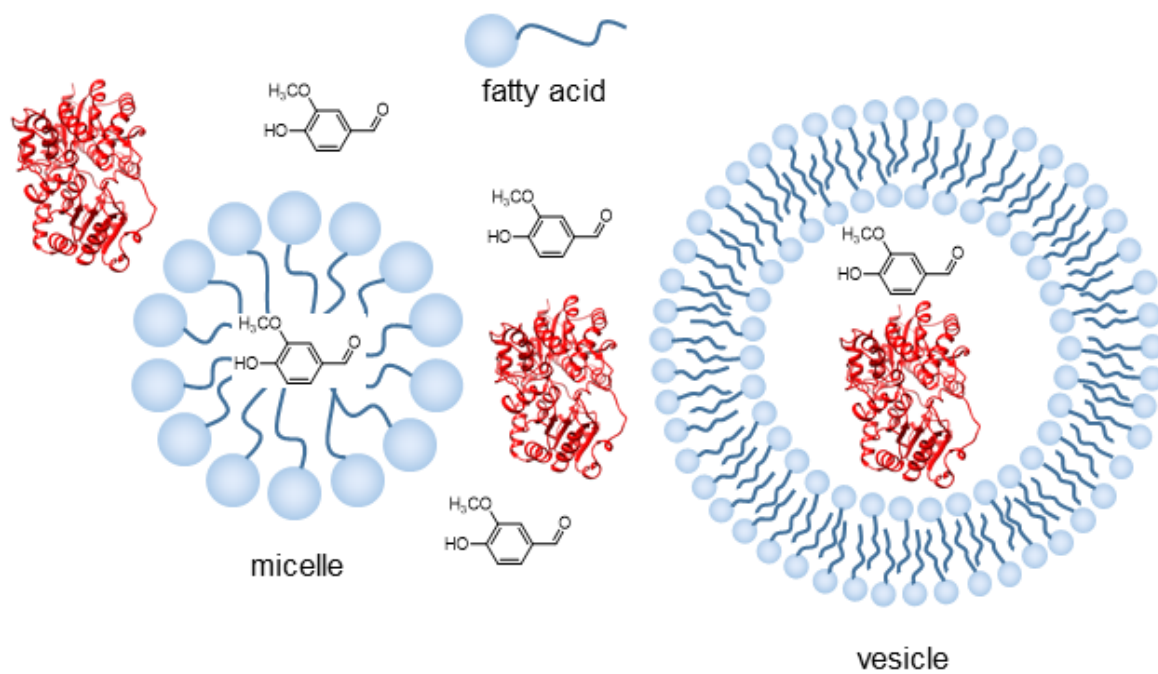

**Figure S4. Enzymatic reaction in the presence of micelles and vesicles formed by fatty acid effectors.**

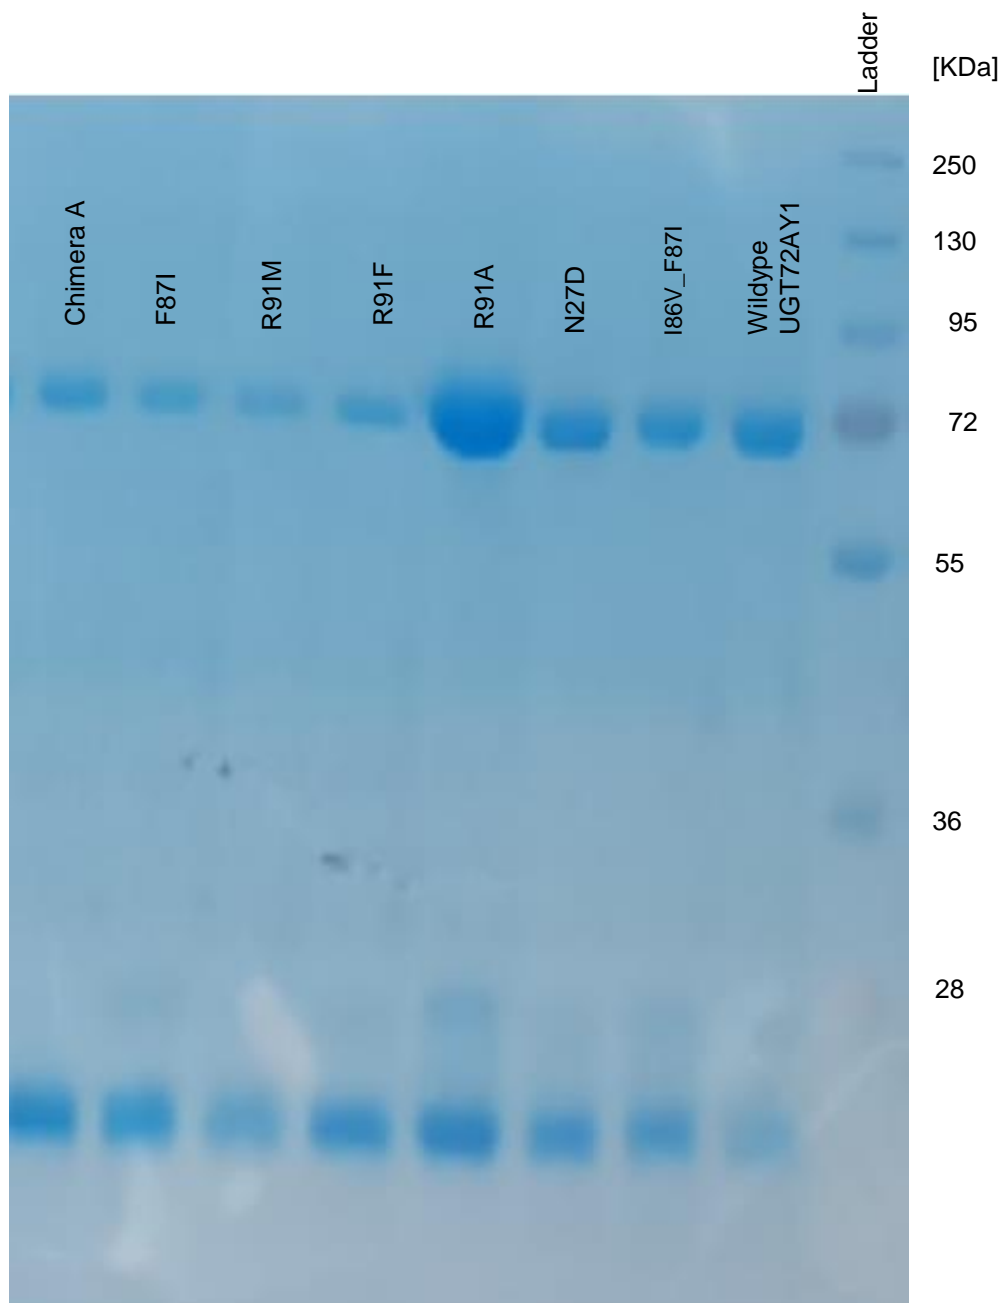

**Figure S5: Verification of NbUGT72AY1 mutant protein by SDS-PAGE.**  
The gel shows the result of the SDS-PAGE that was obtained after GST-affinity purification of the recombinant proteins. Ladder, PageRuler Plus Prestained Protein Ladder
