# Supplementary material for: Acceptors and Effectors Alter Substrate Inhibition Kinetics of a Plant Glucosyltransferase NbUGT72AY1 and Its Mutants
Source: MDPI journal article supplement (doi:10.3390/ijms24119542), 2023-05-31
Supplement: s1 [file s1]

# SUPPLEMENTAL MATERIAL

## Acceptors and Effectors Alter Substrate Inhibition Kinetics of a Plant Glucosyltransferase NbUGT72AY1 and Its Mutants

Jieren Liao 1, Veronika Lederer 1, Alba Bardhi 1, Zhiwei Zou 1, Timothy D. Hoffmann 1, Guangxin Sun 1,†, Chuankui Song 2, Thomas Hoffmann 1 and Wilfried Schwab 1,\*

1 Biotechnology of Natural Products, Technische Universität München, Liesel-Beckmann-Str. 1, 85354 Freising, Germany; jieren.liao@tum.de (J.L.); veronika.lederer@tum.de (V.L.); aalbabardhi10@gmail.com (A.B.); ga96loj@mytum.de (Z.Z.); timothy.d.hoffmann@tum.de (T.D.H.); sgx\_here@hotmail.com (G.S.); tom.hoffmann@tum.de (T.H.)

2 State Key Laboratory of Tea Plant Biology and Utilization, International Joint Laboratory on Tea Chemistry and Health Effects, Anhui Agricultural University, Hefei 230036, China; sckfriend@163.com

\* Correspondence: wilfried.schwab@tum.de

† Current address: Department of Molecular Biophysics and Biochemistry, Yale University, New Haven, CT 06510, USA.

**Table S1. Critical vesicle concentration (CVC) and critical micelle concentration (CMC) of long-chain fatty acids.**

**Table S1.** Critical vesicle concentration (CVC) and critical micelle concentration (CMC) of long-chain fatty acids. Values in mM.

|                | [1]         | [2]     |         |          |          |          |          | [3]        |            | [4]         | [5]          |              |
|----------------|-------------|---------|---------|----------|----------|----------|----------|------------|------------|-------------|--------------|--------------|
|                | CVC<br>pH 9 | CMC pH7 | CMC pH8 | CMC pH 9 | CMC pH10 | CMC pH11 | CMC pH12 | CMC<br>pH8 | CMC<br>pH9 | CMC<br>pH10 | CMC<br>pH ns | CMC<br>pH7.6 |
| stearic acid   |             |         |         |          |          |          |          |            |            |             | 0.5          |              |
| oleic acid     | 0.13        | 0.0471  | 0.045   | 0.052    | 0.057    | 0.074    | 0.115    |            |            |             |              | 0.086        |
| linoleic acid  | 0.51        |         |         |          |          |          |          | 0.021      | 0.060      | 0.117       |              | 0.093        |
| linolenic acid | 1.23        |         |         |          |          |          |          |            |            |             |              | 0.150        |

ns not specified

#### References

1. Teo, Y.Y.; Misran, M.; Low, K.H.; Zain, S.M. Effect of Unsaturation on the Stability of C 18 Polyunsaturated Fatty Acids Vesicles Suspension in Aqueous Solution. *Bulletin of the Korean Chemical Society* 2011, 32, 59–64, doi:10.5012/bkcs.2011.32.1.59.
2. Theander, K.; Pugh, R.J. The Influence of pH and Temperature on the Equilibrium and Dynamic Surface Tension of Aqueous Solutions of Sodium Oleate. *J. Colloid Interface Sci.* 2001, 239, 209–216, doi:10.1006/jcis.2000.7543.
3. Verhagen, J.; Vliegenthart, J.F.; Boldingh, J. Micelle and acid-soap formation of linoleic acid and 13-L-hydroperoxylinoleic acid being substrates of lipoyxygenase-1. *Chem. Phys. Lipids* 1978, 22, 255–259, doi:10.1016/0009-3084(78)90014-2.
4. Fameau, A.-L.; Ventureira, J.; Novales, B.; Douliez, J.-P. Foaming and emulsifying properties of fatty acids neutralized by tetrabutylammonium hydroxide. *Colloids and Surfaces A: Physicochemical and Engineering Aspects* 2012, 403, 87–95, doi:10.1016/j.colsurfa.2012.03.059.
5. Glick, J.; Santoyo, G.; Casey, P.J. Arachidonate and related unsaturated fatty acids selectively inactivate the guanine nucleotide-binding regulatory protein, Gz. *J. Biol. Chem.* 1996, 271, 2949–2954, doi:10.1074/jbc.271.6.2949.
